# Supplementary material for: Advances in continuous manufacturing of albuterol sulfate: optimization of an amination reaction in flow
Source: Royal Society of Chemistry journal article supplement (doi:10.1039/d5re00465a), 2026-01-01
Supplement: d5re00465a1.pdf [file d5re00465a1.pdf]

## Supplementary Information

### Advances in Continuous Manufacturing of Albuterol Sulfate: Optimization of an Amination Reaction in Flow

Kimberly E. Penzer, Daniel G. Gregory, Samantha G. Kohn, Kaitlin E. Kay, Justin T. Turnage,  
James K. Ferri\*

Department of Chemical and Life Science Engineering,  
Virginia Commonwealth University, 601 West Main St., Richmond, VA 23284

#### SI Table of Contents:

- **Section 1. Supplementary Information Figures.**
  - **Scheme 2.** Process Chemistry Route for the Production of Albuterol Sulfate.
  - **Fig. S1.** Representative High Performance Liquid Chromatogram for Amination Species Quantification.
  - **Fig. S2.** Example LC-MS Analysis for Species Identification from Early Batch Study.
  - **Fig. S3.** Response Factor Estimation *via* Chromophore Analysis for Quantification of the Dimer.
  - **Fig. S4.** Kinetic Modeling and Arrhenius Plots.
  - **Fig. S5.** Representative Batch Amination Reaction Calorimetry Data.
  - **Fig. S6.** <sup>1</sup>H NMR simulation of key protons as predicted by ChemDraw.
  - **Fig. S7.** Representative HPLC Chromatograms of a Batch versus Flow Amination Reaction.
- **Section 2. Kinetic Rate Laws and Ordinary Differential Equations for Scheme 1.**
- **Section 3. Model Development for Laminar Flow Reactor.**

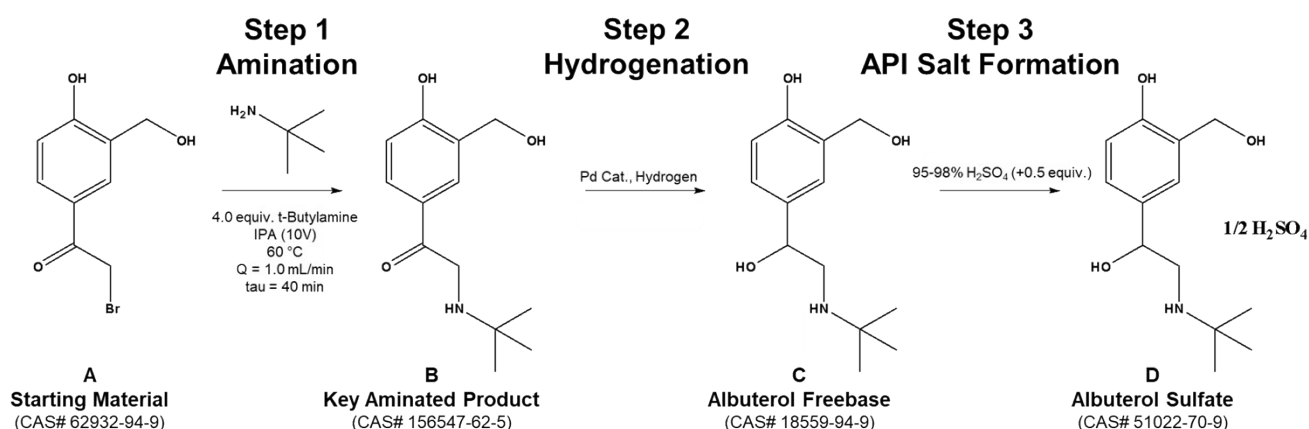

**Scheme 2.** Process chemistry route for the production of albuterol sulfate.

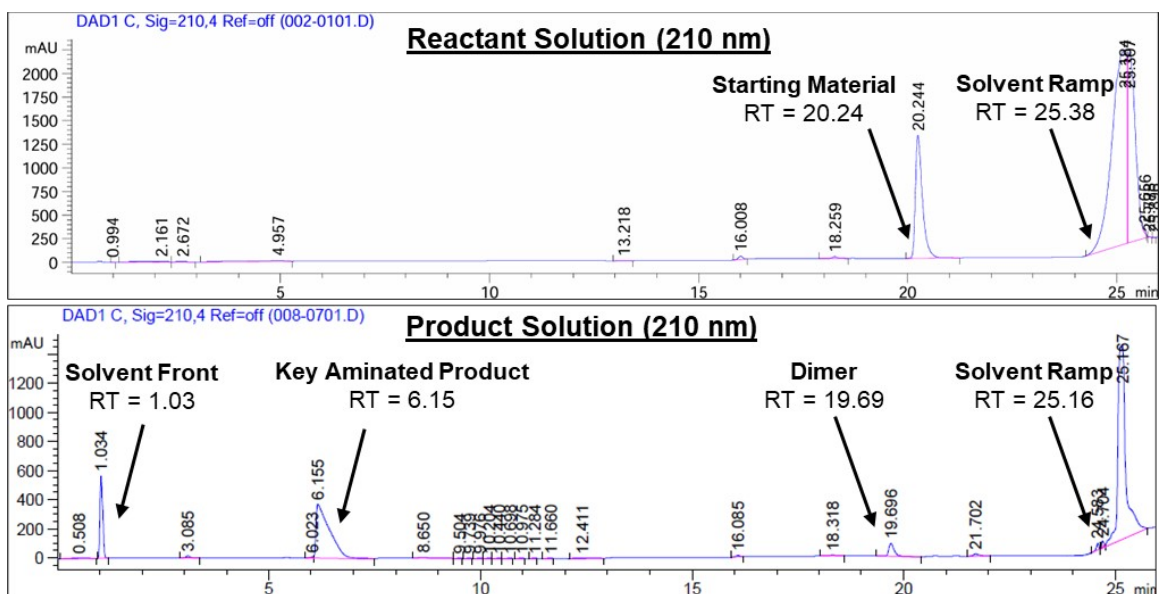

**Fig. S1.** Representative High Performance Liquid Chromatograms for Amination Species Quantification.

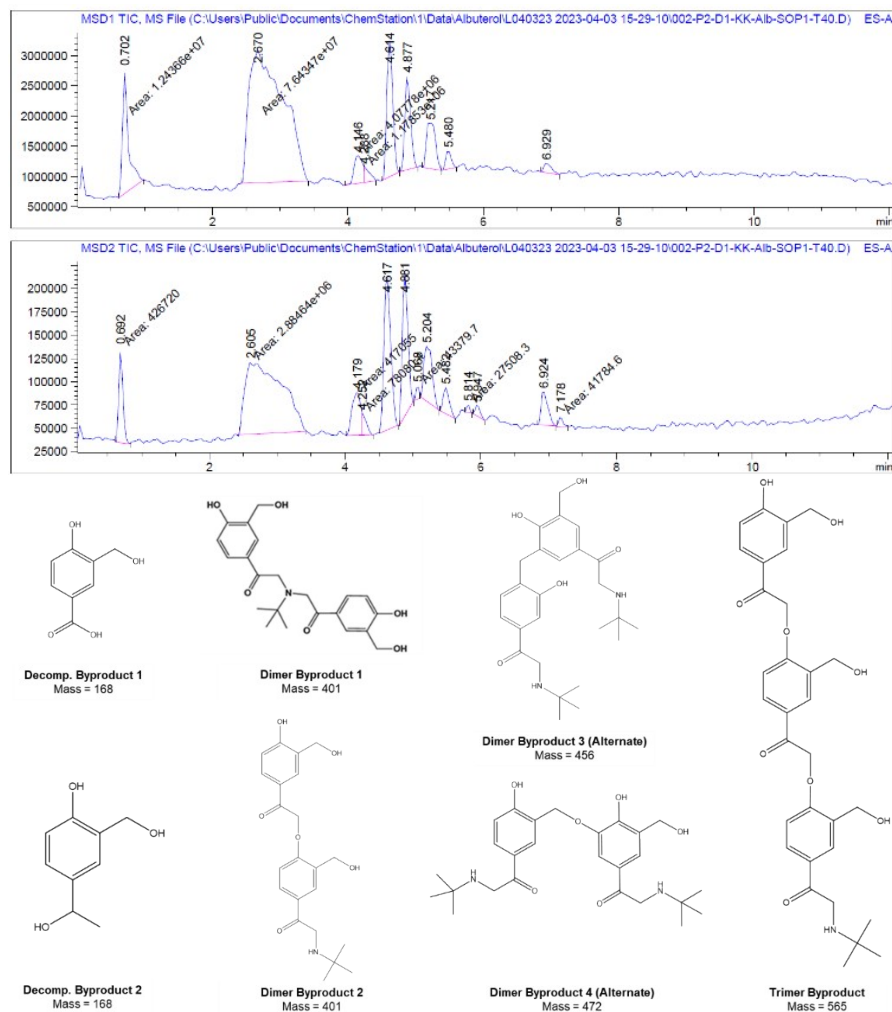

**Fig. S2.** Example liquid chromatography mass spectrometry analysis for species identification from early batch study.

**Table S1.** Example liquid chromatography mass spectrometry analysis for species identification from early batch study.

| RT (min) | 260 nm Area % | m/z                    | Comments         |
|----------|---------------|------------------------|------------------|
| 0.702    | Not Detected  | 227 (ESI+); 232 (ESI-) | 1 Br; 2 Br       |
| 2.670    | 76%           | 238 (M+H); 236 (M-H)   | Key Intermediate |
| 4.146    | 1.00%         | 457 (ESI+); 455 (ESI-) | Dimer            |
| 4.238    | 1.40%         | 457 (ESI+); 455 (ESI-) | Dimer            |
| 4.614    | 11.80%        | 402 (ESI+); 400 (ESI-) | Dimer            |
| 4.877    | 4.40%         | 402 (ESI+); 400 (ESI-) | Dimer            |
| 5.068    | 0.90%         | 199 (ESI-)             | 1 Cl             |
| 5.217    | 2.00%         | 238 (ESI+); 236 (ESI-) | Decomposed       |
| 5.480    | 0.80%         | 566 (ESI+); 564 (ESI-) | Trimer           |
| 5.947    | 0.20%         | 363 (ESI-)             | 1 Cl             |
| 6.929    | 0.09%         | 453 (ESI-)             | 1 Br             |
| 7.178    | 0.08%         | 617 (ESI-)             | 1 Br             |

#### Response Factor Scaling:

- Methodology:** Approximate the concentration of dimer. Relate chromophore count to the response factor of known standards, extrapolate response factor of dimer and create an approximate calibration curve.

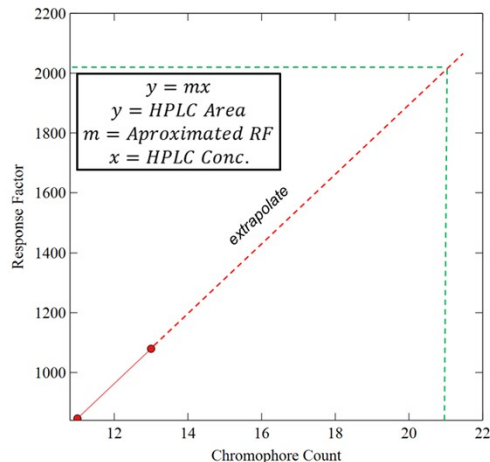

| Chemical Species      | Lone Pair Count | Double Bond Count | Chromophore Count | Response Factor |
|-----------------------|-----------------|-------------------|-------------------|-----------------|
| Starting Material (1) | 9               | 4                 | 13                | 1079.6          |
| Aminated Product (3)  | 7               | 4                 | 11                | 846.2           |
| Dimer Byproduct (4)   | 13              | 8                 | 21                | 2012.9          |

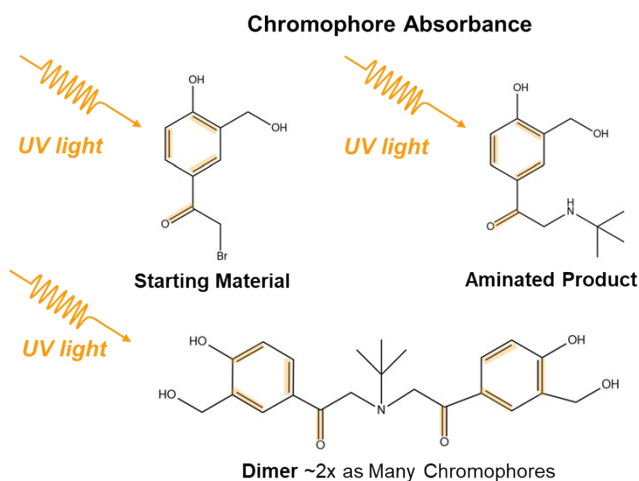

**Fig. S3.** Response Factor Estimation *via* Chromophore Analysis for Quantification of the Dimer.

## Batch Amination Kinetics

- Methodology:** Determine the kinetic rate constants (*k*) and reaction rates (*r*) via batch laboratory studies.
- Arrhenius Equation**
  - Calculates the rate constant
  - Relates reaction rate to Temp.

$$k = Ae^{-E_a/(RT)}$$

*k* = Rate Constant  
*A* = Pre-exponential Factor  
*E<sub>a</sub>* = Activation Energy  
*R* = Gas Constant  
*T* = Temperature

$$\ln k = \frac{-E_a}{R} \left( \frac{1}{T} \right) + \ln A$$

$$\ln k = \ln A - \frac{E_a}{R} \frac{1}{T}$$

$$y = mx + b$$

Reaction 1

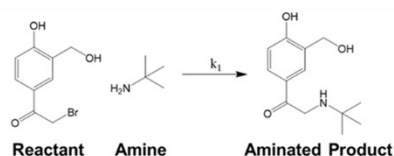

Reaction 2

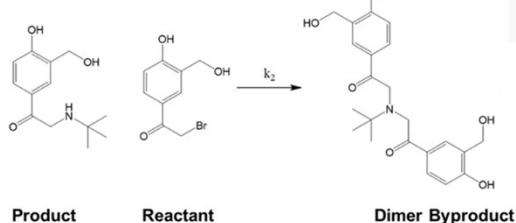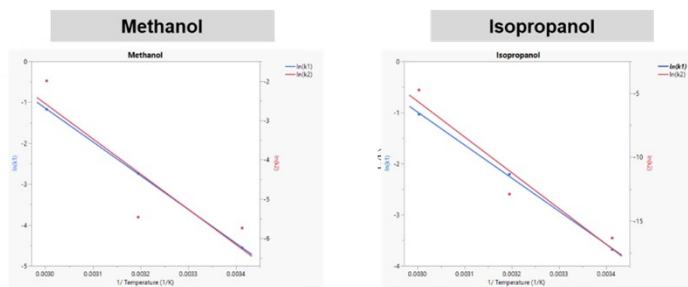

| Parameter                                                    | Methanol                                                                     |                                                                              | Isopropanol                                                                  |                                                                              |
|--------------------------------------------------------------|------------------------------------------------------------------------------|------------------------------------------------------------------------------|------------------------------------------------------------------------------|------------------------------------------------------------------------------|
|                                                              | <i>k</i> <sub>1</sub><br>( <i>M</i> <sup>-1</sup> <i>min</i> <sup>-1</sup> ) | <i>k</i> <sub>2</sub><br>( <i>M</i> <sup>-1</sup> <i>min</i> <sup>-1</sup> ) | <i>k</i> <sub>1</sub><br>( <i>M</i> <sup>-1</sup> <i>min</i> <sup>-1</sup> ) | <i>k</i> <sub>2</sub><br>( <i>M</i> <sup>-1</sup> <i>min</i> <sup>-1</sup> ) |
| Temperature (°C)                                             |                                                                              |                                                                              |                                                                              |                                                                              |
| 20                                                           | 0.0105                                                                       | 0.0032                                                                       | 0.0252                                                                       | 8.00 × 10 <sup>-8</sup>                                                      |
| 40                                                           | 0.0646                                                                       | 0.0043                                                                       | 0.1102 (0.0801)                                                              | 2.51 × 10 <sup>-6</sup>                                                      |
| 60                                                           | 0.3098                                                                       | 0.1364                                                                       | 0.3557                                                                       | 0.0087                                                                       |
| <i>E<sub>a</sub></i> (kJ/mol)                                | 68.79                                                                        | 74.56                                                                        | 53.77                                                                        | 233.14                                                                       |
| <i>A</i> ( <i>M</i> <sup>-1</sup> <i>min</i> <sup>-1</sup> ) | 1.90 × 10 <sup>10</sup>                                                      | 3.64 × 10 <sup>10</sup>                                                      | 9.82 × 10 <sup>7</sup>                                                       | 1.19 × 10 <sup>34</sup>                                                      |

Figure S4. Kinetic Modeling and Arrhenius Plots.

## Calorimetry

- Heat of Reaction Study (Δ*H<sub>Rxn</sub>*)**
  - Quantify the Heat of Reaction through calorimetry.
  - System: EasyMax 102 Reactor from Mettler Toledo
- Overview:**
  - Conditions:** 3 Hr Reaction in MeOH vs. IPA, *T<sub>internal</sub>* = 35°C
  - Measurements:** *C<sub>p</sub>*, Δ*T*, and *Q*

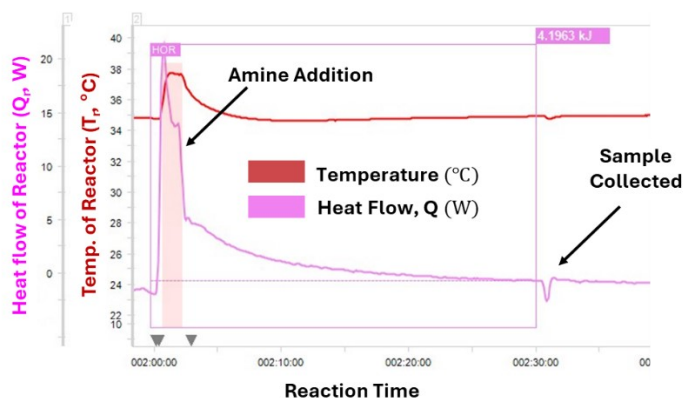

$$\Delta H_{rxn} = \int_{t_0}^{t_f} Q \, dQ$$

$$\Delta \hat{H}_{rxn} = \frac{\Delta H_{rxn}}{\text{moles reacted}}$$

| Solvent | Δ <i>H<sub>r</sub></i> (kJ/mol) | 95% CI |
|---------|---------------------------------|--------|
| IPA     | 179.08                          | 1.43   |
| MeOH    | 265.74                          | 5.05   |

Fig. S5. Representative Batch Amination Reaction Calorimetry Data.

## Amination Reaction

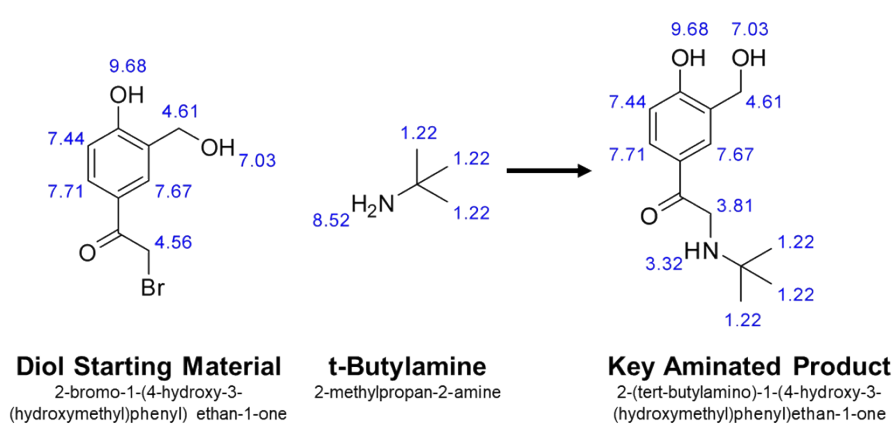

## Solvent & Impurities

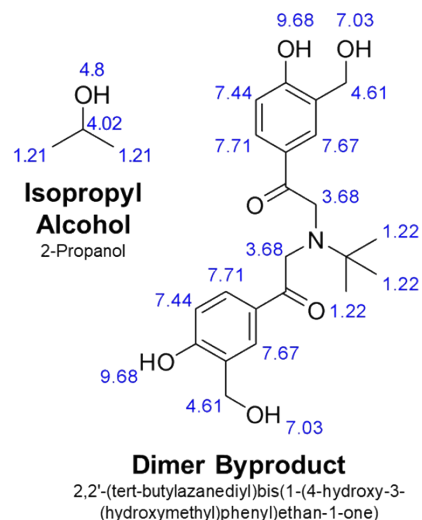

**Fig. S6.**  $^1\text{H}$  NMR simulation of key protons as predicted by ChemDraw.

**Table S2.** Solubility limits of albuterol sulfate in key solvent mediums.

| Solute            | Solvent           | Weight % Solute     |
|-------------------|-------------------|---------------------|
| Albuterol Sulfate | Deionized Water   | $16.7 \pm 1.0$      |
| Albuterol Sulfate | Methanol          | $0.85 \pm 0.01$     |
| Albuterol Sulfate | Ethanol           | $0.175 \pm 0.025$   |
| Albuterol Sulfate | Isopropyl Alcohol | $0.0225 \pm 0.0025$ |

**Table S3.** Solubility limits of the Bromo-Diol Starting Material in key solvent mediums.

| Solute        | Solvent  | Temp. | Concentration | Weight % Solute |
|---------------|----------|-------|---------------|-----------------|
| Bromo-Diol SM | Methanol | RT    | 120 mg/mL     | 13.2 wt%        |
| Bromo-Diol SM | Methanol | 40°C  | 190 mg/mL     | 19.4 wt%        |
| Bromo-Diol SM | IPA      | RT    | 50 mg/mL      | 5.9 wt%         |
| Bromo-Diol SM | IPA      | 40°C  | 120 mg/mL     | 13.2 wt%        |

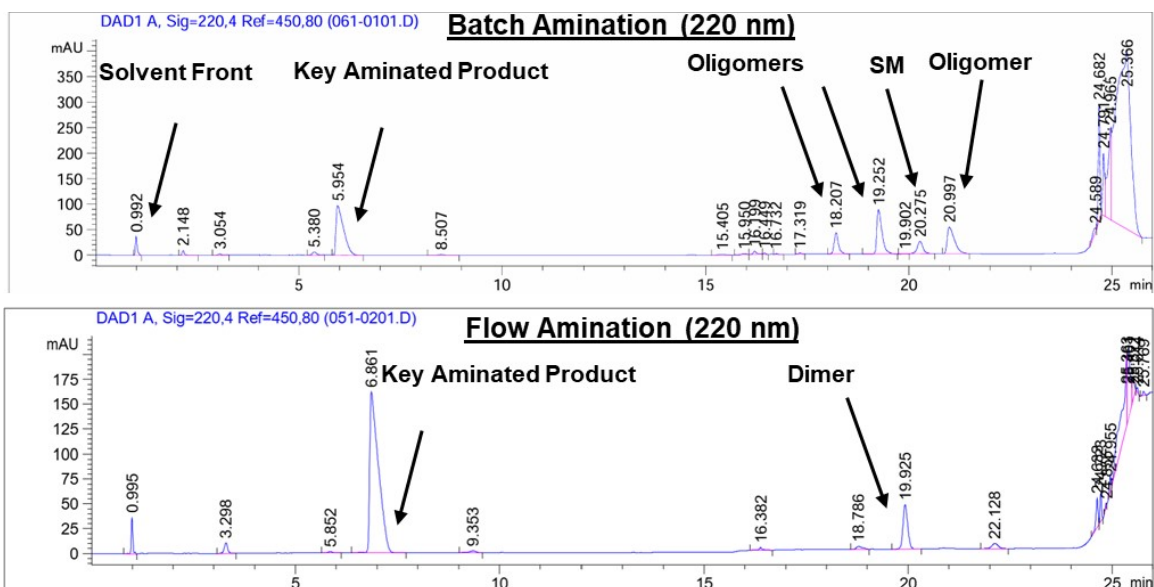

**Fig. S7.** Representative HPLC Chromatograms of a batch versus flow amination reaction

**Table S4.** A representative comparison of HPLC peak areas for a batch versus flow study.

| Species                | Rt      | Flow      |        | Batch     |        |
|------------------------|---------|-----------|--------|-----------|--------|
|                        |         | Peak Area | Area % | Peak Area | Area % |
| Solvent Front          | 0.9     | 105.0     | 3.7%   | 119.5     | 3.6%   |
| Product                | 5.9-6.0 | 2384.9    | 83.6%  | 1262.2    | 37.7%  |
| Oligomerized Byproduct | 18.2    | -         | -      | 305.4     | 9.1%   |
| Dimerized Byproduct    | 19.2    | 362.5     | 12.7%  | 775.7     | 23.2%  |
| Starting Material      | 20.2    | -         | -      | 244.9     | 7.3%   |
| Oligomerized Byproduct | 20.9    | -         | -      | 636.0     | 19.0%  |

## Section 2. Kinetic Rate Laws.

Coupled ordinary differential equations (ODEs) used as rate laws to model the amination reaction as shown in Scheme 1:

$$r_{Starting\ Material} = \frac{dC_{SM}}{dt} = -k_1 C_{SM} C_{TBA} - k_2 C_{SM} C_{Prod}$$

$$r_{TBA} = \frac{dC_{TBA}}{dt} = -k_1 C_{SM} C_{TBA}$$

$$r_{Product} = \frac{dC_{Prod}}{dt} = k_1 C_{SM} C_{TBA} - k_2 C_{SM} C_{Prod}$$

$$r_{Dimer} = \frac{dC_D}{dt} = k_2 C_{SM} C_{Prod}$$

$$r_{Net} = \frac{dC_{Net}}{dt} = k_1 C_{SM} C_{TBA} + k_2 C_{SM} C_{Prod}$$

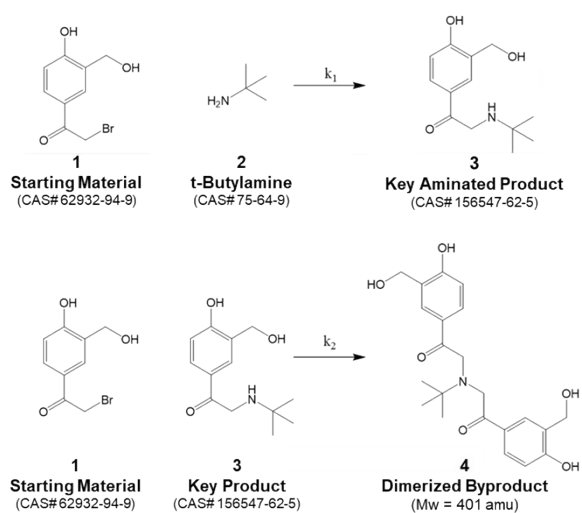

### Section 3. Model Development for Laminar Flow Reactor.

For a reaction being performed in a continuous operation that is flowing through a tubular system with a high Reynold's number ( $Re > 4,000$ ), plug flow is the expected fluid behavior. Meanwhile, for that same system with a low Reynold's number ( $Re < 2,100$ ), laminar flow is the expected fluid behavior. Additionally, both plug and laminar flow conversion models depend on the order of the reaction. For a first or second order reaction with plug flow behavior, the design equation for predicting conversion is already analytically solved,<sup>1</sup> however the derivation for a conversion model in laminar flow is as so:<sup>2</sup>

For a Newtonian fluid flowing with a fully developed laminar flow in a cylindrical pipe of length  $L$  and radius  $R$ , the following velocity profile is obtained:

$$u = 2\bar{u}(1 - (r/R)^2) \quad (1)$$

Where  $\bar{u} = u_{max}/2$ . By performing a mass balance on species A, the following is obtained:

$$D \frac{\partial^2 C_A}{\partial z^2} - u \frac{\partial C_A}{\partial z} + \frac{D}{r} \frac{\partial}{\partial r} \left( r \frac{\partial C_A}{\partial r} \right) - r_A = \frac{\partial C_A}{\partial t} \quad (2)$$

For non-dimensionalization, the following expressions can be made:

$$\xi = \frac{z}{L}; \eta = \frac{r}{R}; \theta = \frac{t}{\bar{t}}; c = \frac{C_A}{C_{A_0}}$$

Where  $\bar{t} = L/\bar{u}$ , the mean residence time, and  $C_{A_0}$  is the initial concentration of species A. Therefore, for an  $n^{th}$  order reaction, the following can be obtained:

$$\frac{D}{\bar{u}L} \frac{\partial^2 c}{\partial \xi^2} - 2(1 - \eta^2) \frac{\partial c}{\partial \xi} + \frac{D}{\bar{u}R} \left( \frac{1}{\eta} \frac{\partial}{\partial \eta} \left( \eta \frac{\partial c}{\partial \eta} \right) \right) - k C_{A_0}^{n-1} \bar{t} c^n = \frac{\partial c}{\partial \theta} \quad (3)$$

Assuming that the ratio between axial diffusion time to overall process time is significantly larger than 1 and that the system is operating at steady-state, then a simplified version of Equation 11 can be obtained:

$$-2(1 - \eta^2) \frac{\partial c}{\partial \xi} - Da_n c^n = 0 \quad (4)$$

Where  $Da_n = k C_{A_0}^{n-1} \bar{t}$  and is known as the Damkohler number. Therefore, the following conversion models can be obtained for a reaction under laminar flow:

$$c_{exit} = C_{A_0} \left[ \left( 1 - \frac{Da}{2} \right) \exp \left( \frac{-Da}{2} \right) + \frac{Da}{4} E_1 \left( \frac{Da}{2} \right) \right] \quad (5)$$

$$c_{exit} = C_{A_0} \left[ \frac{Da^2 \log(-Da)}{2} + \frac{Da^2 \log(-Da - 2)}{2} - Da + 1 \right] \quad (6)$$

Here Equation 5 models a 1<sup>st</sup> order reaction and Equation 6 models a 2<sup>nd</sup> order reaction.  $E_1$  is known as an exponential integral.

<sup>1</sup>Levenspiel, O. Chemical Reaction Engineering. *Ind Eng Chem Res* **1999**, 38 (11), 4140–4143. <https://doi.org/10.1021/ie990488g>.

<sup>2</sup>Fogler, S. *Elements of Chemical Reaction Engineering*, 6th ed.; Pearson Education Ltd., 2022.
